# 1 Suicide prevention curriculum development 2 for health and social care students: Protocol 3 for a scoping review

## 4 Authors

5 Kerrie Gallagher<sup>1¶</sup>, Clíodhna O' Brien<sup>1¶</sup>, Doireann Ní Dhalaigh<sup>2&</sup> Paul Corcoran<sup>1&</sup>, Eve Griffin<sup>1, 2\* ¶</sup>

6 1. National Suicide Research Foundation, Cork, Ireland

7 2. School of Public Health, University College Cork. Ireland

8 \*Corresponding author

9 [evegriffin@ucc.ie](mailto:evegriffin@ucc.ie) (EG)

## 10 Funding

11 This study was funded by the National Office for Suicide Prevention, Health Service Executive,  
12 Ireland.

## 13 Competing interests

14 The authors declare they have no competing interests.

## 15 Data availability

16 For requests to access data gathered from this review, the corresponding author can be contacted.

**NOTE: This preprint reports new research that has not been certified by peer review and should not be used to guide clinical practice.**

## 17 **Abstract**

18 **Background:** Suicide has become a serious public health concern and international research has  
19 shown that the majority of individuals who died by suicide had received healthcare in the year prior  
20 to their death. This presents an opportunity for suicide prevention by strategically training  
21 healthcare students in suicide prevention knowledge and skills.

22 **Objective:** The objective of this scoping review is to identify the literature on the development and  
23 implementation of suicide prevention curricula for undergraduate and postgraduate students of  
24 health and social care degree programmes.

25 **Inclusion criteria:** Studies will only be considered eligible for inclusion if they describe the  
26 development and/or implementation of suicide prevention curricula being taught to health and  
27 social care degree students in higher education/university settings. Quantitative, qualitative and  
28 mixed method studies published between 2011 and 2023 (inclusive) and in the English language will  
29 be considered eligible.

30 **Methods:** This scoping review will be conducted according to the PRISMA guidelines for scoping  
31 reviews (PRISMA-ScR). The developed search strategy will be implemented across seven databases:  
32 Australian Educational Index, British Educational Index, ERIC (Education Resources Information  
33 Center), PsycINFO, Embase, Scopus and Web of Science. Several grey literature databases will also  
34 be consulted. Further potential results will be located by hand-searching the reference lists of  
35 included articles. The search strategy will include variations of the terms 'university students',  
36 'suicide prevention' and 'education'. The search terms will be limited to titles, abstracts, and  
37 keywords in databases that allow it. Two reviewers will complete the screening using the predefined  
38 inclusion criteria. A third reviewer will resolve any conflicts during the screening and eligibility  
39 appraisal processes. Results will be presented in the form of tabulated results and an accompanying

40 narrative summary, describing key findings and context related to learning outcomes,  
41 methodologies employed and implementation of the identified programmes.

## 42 **Introduction**

43 It is widely recognised that suicide is a serious public health concern. Healthcare settings provide a  
44 unique opportunity to incorporate suicide prevention strategies (1). These strategies can focus on  
45 providing mental health support, screening for suicidal risk, early intervention, and creating an  
46 environment that encourages help-seeking behaviour (2,3). However, evidence shows that many  
47 existing clinical training programmes do not adequately prepare healthcare professionals to engage  
48 in suicide prevention (4,5).

49 A population-based cohort study conducted in Sweden between 2004 and 2015 found that 86% of  
50 individuals who died by suicide received healthcare in the year preceding their death (6). It was also  
51 estimated that in the month before their death, 53% of those who died by suicide had received  
52 some form of healthcare consultation. This is compared with 20% in the general population (6).

53 Health professionals, such as nurses, pharmacists, primary care providers and social workers, are  
54 well-positioned to detect signs and symptoms of suicidal ideation and behaviours and provide those  
55 at risk with the appropriate referrals to support (7–10). Training of healthcare staff has been  
56 highlighted as an important element of suicide intervention and prevention (11). However,  
57 healthcare staff often do not receive appropriate training or lack knowledge and awareness of  
58 suicide and self-harm that allows for an appropriate response to suicide risk, primarily due to a lack  
59 of resources for healthcare professionals to gain access to appropriate information and training (12–  
60 14). This is reflected in the fact that both professional practitioners and students rate their own  
61 interpersonal suicide prevention skills as poor (15). This lack of confidence on the part of healthcare  
62 professionals in their own competence in risk screening and intervention may serve as a barrier to  
63 effective suicide prevention in the healthcare setting (16,17).

64 A suicide prevention programme targeted at healthcare students provides an ideal opportunity to  
65 ensure a universal approach to suicide prevention in the healthcare system, as all graduates will  
66 begin their careers with similar knowledge, attitudes, and skills. To the best of the authors'  
67 knowledge, the extent of the evidence regarding a suicide prevention curriculum for health and  
68 social care students has not been reported on to date. The aim of this article is to describe protocol  
69 for a scoping review to map the literature on suicide prevention within undergraduate and  
70 postgraduate health and social care curricula. This question was prompted by the recognised need  
71 for a national standardised undergraduate suicide prevention curriculum in the Republic of Ireland.  
72 It is intended that this scoping review will help inform the development of a suicide prevention  
73 curriculum for undergraduate health and social care students in the Irish higher education setting.

#### 74 **Methods**

75 The reporting items in this protocol comply with the Preferred Reporting Items for Systematic  
76 Reviews and Meta-Analyses extension for Scoping Reviews (PRISMA-ScR) guidelines (18) (Appendix 1  
77 in Supplementary Information). We chose to adopt a scoping review approach for this research as  
78 the evidence on suicide prevention curricula is still emerging, particularly for health and social care  
79 students. A scoping review is an appropriate method for this research since the main aim of this  
80 review is to give an overview of the available evidence relating to the development and  
81 implementation of suicide prevention curricula in third level institutions internationally. To identify  
82 potential similarities and differences between suicide prevention programmes, we intend to review  
83 the available evidence regarding the content and delivery of these programmes and, where  
84 applicable, their impact on student learning. We used the work of Arksey and O'Malley to design the  
85 scoping review protocol (19) and utilised five primary stages to inform the study design: (i)  
86 identifying the research question; (ii) identifying relevant studies; (iii) study selection; (iv) charting  
87 data; (v) collating, summarizing, and reporting the results.

88 **(i) Identifying the research question**

89 The scoping review will seek to address the following question:

90 “What educational methodologies are employed to implement suicide prevention courses in higher  
91 education, both in terms of content and delivery, and, where applicable, their impact on student  
92 learning?”.

93 **Eligibility criteria**

94 **Participants and context**

95 Studies that examine suicide prevention curricula being taught to undergraduate/postgraduate  
96 health and/or social care degree students in a higher education setting will be considered eligible for  
97 inclusion in the review process. There will be no limits set on region of publication, however, due to  
98 limited resources, studies published in the English language since 1<sup>st</sup> January 2011 will be included  
99 for examination. Studies will not be included if they report on suicide prevention training  
100 implementation outside of or in addition to the university/higher education curriculum.

101 **Types of Sources**

102 Quantitative, qualitative and mixed method studies, as well as any studies that describe the  
103 development of a suicide prevention module in higher education settings will be considered for  
104 inclusion. Any relevant grey literature will also be included. Table 1 details the inclusion and  
105 exclusion criteria for the review.

106

107

108

109

110

| <b>Table 1: Inclusion and exclusion criteria</b>                                                                                  |                                                                                                                                      |
|-----------------------------------------------------------------------------------------------------------------------------------|--------------------------------------------------------------------------------------------------------------------------------------|
| <b>Include</b>                                                                                                                    | <b>Exclude</b>                                                                                                                       |
| Articles focused on developing and/or implementing suicide prevention programmes as part of the higher education curriculum       | Articles not published in the English language                                                                                       |
| Articles reporting on empirical research                                                                                          | Articles reporting suicide prevention training delivered to health or social care students independent of the third level curriculum |
| Articles reporting on qualitative research                                                                                        | Articles reporting research or programmes for other populations (e.g., GP gatekeeping training)                                      |
| Articles employing mixed methods design                                                                                           |                                                                                                                                      |
| Descriptive articles detailing the content development and/ or implementation of suicide prevention education in higher education |                                                                                                                                      |
| Articles published since 2011                                                                                                     | Articles published before 2011                                                                                                       |

111

112 **(ii) Identifying relevant studies**

113 The search strategy will aim to locate peer-reviewed articles and any relevant grey literature, if  
 114 available. An initial limited search of Scopus and Web of Science Core Collection was undertaken to  
 115 identify the potential scope of published articles on the topic. The text words contained in the titles  
 116 and abstracts of relevant articles, and the index terms used to describe the articles will be used to  
 117 develop a full search strategy for seven electronic databases: Australian Educational Index, British  
 118 Educational Index, ERIC, PsycINFO, Embase, Scopus and Web of Science Core Collection (see Table  
 119 2). It is anticipated that the search strategy for the review, including all identified keywords will be  
 120 tailored to each database. Further to this, relevant grey literature databases will be searched to  
 121 retrieve items that would not otherwise be available through the above databases. There will be  
 122 several databases included in this project, including Google Scholar, the Suicide Prevention Resource  
 123 Center (SPRC), Grey Matters, Open Grey, and ResearchGate. The search terms will be limited to  
 124 titles, abstracts, and keywords in databases that allow it. It is also planned to manually search the

125 reference lists of the included studies to identify any potentially overlooked materials. Should  
126 conference abstracts and study protocols satisfy the inclusion criteria, we will endeavour to retrieve  
127 the full article reporting on the development and/or implementation of the curriculum. The search  
128 strategy will include variations of the terms ‘*university students*’, ‘*suicide prevention*’ and ‘*education*’.  
129 An example of the search strategy to be used is displayed in Table 2.

**Table 2: Search strategy for Web of Science Core Collection**

| Database                       | Rationale for searching                                                                                                             | Search strategy                                                                                                                                                                                                                                                                  |
|--------------------------------|-------------------------------------------------------------------------------------------------------------------------------------|----------------------------------------------------------------------------------------------------------------------------------------------------------------------------------------------------------------------------------------------------------------------------------|
| Web of Science Core Collection | Considering that the Web of Science has multidisciplinary contents from a broad range of academic disciplines, it will be searched. | ((“suicide prevention training”) OR (“suicide prevention education”) OR (“suicide prevention teaching”)) AND ((“higher education”) OR (“third level education”) OR (“college” OR “university”))<br><br>Limit to English Language<br>Limit to studies published between 2011-2023 |

130

### 131 (iii) Study selection

132 Following the search, all identified citations will be collated and uploaded into the reference  
133 manager Zotero, Version 6.0.20. After this, all citations will be imported into Rayyan, and duplicates  
134 removed. Rayyan is a free web-tool designed to assist researchers conducting systematic reviews,  
135 scoping reviews, and other projects involving knowledge synthesis (20). Screening will follow two  
136 stages: (i) title and abstract screening; (ii) full-text screening. Regarding the grey literature, which  
137 often lacks abstracts, texts will be screened through executive summaries, table of contents, or  
138 other comparable methods. If these methods of screening are not available, grey literature will be  
139 advanced to full-text screening. Two reviewers will independently conduct both screening stages  
140 and assess each stage against the inclusion criteria. In the event of any discrepancies, a third  
141 reviewer will be consulted. This search and study inclusion process will be described in full in the  
142 final scoping review along with a Preferred Reporting Items for Systematic Reviews and Meta-

143 analyses extension for scoping review (PRISMA-ScR flow chart) (18). Using the PRISMA diagram, the  
144 review process will be illustrated and stages where studies were eliminated will be recorded.

145

#### 146 **(iv) Charting the data**

147 A purpose-designed data extraction spreadsheet will be used to extract the following information  
148 from all included studies: Data items will include details of the publication e.g., author, country, year  
149 of publication, study setting (e.g., university,); the study population (degree course, stage of the  
150 degree, number of students); details of the programme (e.g., session length, number of sessions);  
151 learning outcomes; accreditation body, was the training deemed to be 'essential' and was  
152 attendance 'mandatory'; level of content delivered (i.e., foundational, basic, advanced, expert,  
153 other, unspecified); how the programme was implemented; methodologies used; staff training  
154 needs and assessment methods employed). A draft extraction form is provided (see Appendix 2 in  
155 Supplementary Information). The draft data extraction tool will be modified and revised as  
156 necessary during the process of extracting data from the various evidence sources that have been  
157 included in the review. Any modifications made during this stage of the process will be detailed in  
158 the scoping review. If disagreements arise between the reviewers, they will be resolved by involving  
159 the third reviewer.

#### 160 **(v) Collating, summarising, and reporting the results**

161 The objective of this scoping review is to map existing evidence regarding the development and  
162 implementation of suicide prevention programmes in higher education. Data abstraction will be  
163 conducted by two reviewers independently from full-text records included in the review. As a means  
164 of ensuring accuracy and consistency, each reviewer's abstracted data will be compared, and  
165 discrepancies will be discussed with the third reviewer. A request for missing or additional  
166 information will be made to the authors of selected records, if necessary. To facilitate the mapping



167 of common patterns in the data, thematic analysis methods will be employed. This process will  
168 provide a summary of key findings regarding suicide prevention for health and social care students,  
169 including programme design and/or implementation. Where applicable changes in student  
170 knowledge, attitudes and confidence will also be reported. Based on the eligibility criteria, it is  
171 anticipated that some of the identified studies will be descriptive in nature and will not be subject to  
172 critical appraisal; where possible, critical appraisal will be conducted for effectiveness studies. A  
173 detailed description of the tools and strategies used for the critical appraisal will be included in the  
174 supplementary information of the review, as well as a discussion of its findings in the main text. Any  
175 relevant abstracted information will be charted in the form of tabular results and an accompanying  
176 narrative summary, which will include key findings and contextual information regarding the topics,  
177 learning outcomes, and methodologies employed.

178

## 179 **Limitations**

180 The authors recognize that this study will have limitations. As we are constrained by resources, only  
181 studies published in the English language will be included. We have also noted a limitation with  
182 respect to the search of grey literature; even if grey literature is reviewed systematically, some  
183 sources may be overlooked. We will attempt to overcome this by searching as many sources as  
184 possible in the time we have allocated to complete the review.

## 185 **Discussion**

186

187 The interaction between patients and their healthcare professional provides an opportunity to  
188 screen and assess for patient suicide risk given the evidence that the majority of people who die by  
189 suicide have been in contact with a health professional in the year preceding their death (1). The  
190 provision of suicide prevention training for undergraduate students of the healthcare professions  
191 presents an ideal opportunity to equip healthcare professionals with relevant suicide prevention

192 skills, knowledge and confidence. The purpose of the proposed review is to give an overview of  
193 suicide prevention programmes that are taught within undergraduate and postgraduate health and  
194 social care curricula. The information gathered will be presented in a published scoping review.

195 Seven databases have been identified as being most relevant to the present study. Two independent  
196 reviewers will review the abstracts and full texts of the search to identify eligible and relevant papers  
197 which will contribute to our understanding of suicide prevention in higher education.

198 As opposed to consulting with stakeholders at the end of the scoping process, our partners will be  
199 involved at various stages of the process. The findings will be used by the authors in National Suicide  
200 Research Foundation with the Health Service Executive National Office for Suicide Prevention to  
201 inform the development of a national suicide prevention curriculum for all health and social care  
202 undergraduate students. The findings will provide an evidence-base that can be utilised to develop  
203 and/or further enhance suicide prevention curricula in higher education institutions in the Republic  
204 of Ireland.

#### 205 **Authors' contributions**

206 Conceptualisation: Kerrie Gallagher, Clíodhna O' Brien, Doireann Ní Dhalaigh, Paul Corcoran, Eve  
207 Griffin

208 Funding Acquisition: This study was commissioned by the Health Service Executive, National Office  
209 for Suicide Prevention (NOSP).

210 Methodology: Kerrie Gallagher, Clíodhna O' Brien, Doireann Ní Dhalaigh Paul Corcoran, Eve Griffin

211 Project administration: Kerrie Gallagher, Clíodhna O' Brien, Doireann Ní Dhalaigh

212 Writing – original draft: Kerrie Gallagher, Clíodhna O' Brien, Eve Griffin

213 Writing – review and editing: Kerrie Gallagher, Clíodhna O' Brien, Doireann Ní Dhalaigh, Paul  
214 Corcoran, Eve Griffin

#### 215 **Acknowledgements**

216 The authors would like to acknowledge the support of the Health Service Executive National Office  
217 for Suicide Prevention, in particular Prof. Phillip Dodd, Clinical Advisor and Ms. Ailish O'Neill,  
218 National Education and Training Manager.

## 219 References

- 220 1. Witry MJ, Neblett K, Hutchens S, Catney C. When a patient talks about suicide: Adding a social  
221 worker led session on the pharmacist's role in suicide prevention to the PharmD curriculum. *Curr*  
222 *Pharm Teach Learn*. 2019;11(6):585–91.
- 223 2. de Beurs DP, de Groot MH, de Keijser J, van Duijn E, de Winter RFP, Kerkhof AJFM. Evaluation of  
224 benefit to patients of training mental health professionals in suicide guidelines: cluster  
225 randomised trial. *Br J Psychiatry J Ment Sci*. 2016 May;208(5):477–83.
- 226 3. Dunster-Page C, Haddock G, Wainwright L, Berry K. The relationship between therapeutic alliance  
227 and patient's suicidal thoughts, self-harming behaviours and suicide attempts: A systematic  
228 review. *J Affect Disord*. 2017 Dec 1;223:165–74.
- 229 4. Schmitz Jr WM, Allen MH, Feldman BN, Gutin NJ, Jahn DR, Kleespies PM, et al. Preventing suicide  
230 through improved training in suicide risk assessment and care: An American Association of  
231 Suicidology Task Force report addressing serious gaps in US mental health training. *Suicide*  
232 *Life-Threatening Behav*. 2012;42(3):292–304.
- 233 5. Delaney T, Nelson L, Lopez D. Suicide Prevention Education for Health Care Providers: Challenges  
234 and Opportunities. In: Pompili M, editor. *Suicide Risk Assessment and Prevention [Internet]*.  
235 Cham: Springer International Publishing; 2021. p. 1–21. Available from:  
236 [https://doi.org/10.1007/978-3-030-41319-4\\_9-1](https://doi.org/10.1007/978-3-030-41319-4_9-1)
- 237 6. Bondesson E, Alpar T, Petersson IF, Schelin MEC, Jöud A. Health care utilization among individuals  
238 who die by suicide as compared to the general population: a population-based register study in  
239 Sweden. *BMC Public Health*. 2022 Aug 25;22(1):1616.
- 240 7. Almeida J, O'Brien KH, Gironda CM, Gross EB. Development, implementation, and evaluation of a  
241 comprehensive course on suicide in a master's of social work program. *J Soc Work Educ*.  
242 2017;53(4):727–36.
- 243 8. Ward L. SMILE: Simple, mental health, initiative in learning and education. *Educ Health*.  
244 2011;24(3):537.
- 245 9. Witry M, Kauer J, Fravel M, Reist J, Viyyuri B. Evaluation of a question persuade refer (QPR)  
246 training for student pharmacists. *Ment Health Prev*. 2020;18:200180.
- 247 10. Wittink MN, Levandowski BA, Funderburk JS, Chelenza M, Wood JR, Pigeon WR. Team-based  
248 suicide prevention: lessons learned from early adopters of collaborative care. *J Interprof Care*.  
249 2020;34(3):400–6.
- 250 11. Knipe D, Padmanathan P, Newton-Howes G, Chan LF, Kapur N. Suicide and self-harm. *The Lancet*.  
251 2022 May 14;399(10338):1903–16.
- 252 12. Tanaka K, Ikeuchi S. Difficulties in suicide prevention facing primary healthcare workers based on  
253 the characteristics of people with suicide risk and healthcare systems. *J Adv Nurs*. 2022 Dec  
254 4;jan.15522.
- 255 13. Bolster C MN ARNP, Holliday C PhD ARNP, Oneal G PhD, RN, Shaw M PhD, RN. Suicide  
256 Assessment and Nurses: What Does the Evidence Show? *Online J Issues Nurs*. 2015 Jan;20(1):81–  
257 7.

- 258 14. Hogan MF, Grumet JG. Suicide Prevention: An Emerging Priority For Health Care. *Health Aff*  
259 (Millwood). 2016 Jun;35(6):1084–90.
- 260 15. De Silva E, Bowerman L, Zimitat C. A suicide awareness and intervention program for health  
261 professional students. *Educ Health*. 2015;28(3):201.
- 262 16. Boukouvalas E, El-Den S, Murphy AL, Salvador-Carulla L, O’Reilly CL. Exploring Health Care  
263 Professionals’ Knowledge of, Attitudes Towards, and Confidence in Caring for People at Risk of  
264 Suicide: a Systematic Review. *Arch Suicide Res*. 2020 Aug 31;24(sup2):S1–31.
- 265 17. Fedorowicz SE, Dempsey RC, Ellis N, Phillips E, Gidlow C. How is suicide risk assessed in  
266 healthcare settings in the UK? A systematic scoping review. Aslam MS, editor. *PLOS ONE*. 2023  
267 Feb 2;18(2):e0280789.
- 268 18. Tricco AC, Lillie E, Zarin W, O’Brien KK, Colquhoun H, Levac D, et al. PRISMA extension for scoping  
269 reviews (PRISMA-ScR): checklist and explanation. *Ann Intern Med*. 2018;169(7):467–73.
- 270 19. Arksey H, O’Malley L. Scoping studies: towards a methodological framework. *Int J Soc Res*  
271 *Methodol*. 2005;8(1):19–32.
- 272 20. Ouzzani M, Hammady H, Fedorowicz Z, Elmagarmid A. Rayyan—a web and mobile app for  
273 systematic reviews. *Syst Rev*. 2016 Dec;5(1):210.

274

275

276

277

278

279

280

281

282

283

284

285

286

287

288

289

290
